# Supplementary material for: Examination of Type 2 Diabetes Loci Implicates CDKAL1 as a Birth Weight Gene
Source: Oxford University Press journal article supplement (doi:10.2337/db09-0506), 2009-07-10
Supplement: db090506-sup-second_resubmission_diabetes_supplementary_tables_clean.doc [file db090506-sup-second_resubmission_diabetes_supplementary_tables_clean.doc]

**Supplementary Table 1. Surrogates used in this study (derived from the CEU HapMap)**

| CHR | SNP on our Illumina Infinium™ II HumanHap550 BeadChip | SNP used in other system | r2 | Genes Nearby |
| --- | --- | --- | --- | --- |
| 1 | rs2793831 | rs10923931 | 1 | *NOTCH2* |
| 2 | rs3828345 | rs7571442 | 0.94 | *CAPN10* |
| 3 | rs4411878 | rs4607103 | 1 | *ADAMTS9* |
| 3 | rs6802898 | rs1801282 | 1 | *PPARG* |
| 6 | rs4712523 | rs10946398 | 1 | *CDKAL2* |
| 7 | rs1635852 | rs864745 | 0.965 | *JAZF1* |
| 9 | rs2383208 | rs10811661 | 1 | *CDKN2A/B* |
| 10 | rs11257622 | rs12779790 | 0.833 | *CDC123-CAMK1D* |
| 11 | rs729287 | rs3740878 | 1 | *EXT2* |
| 11 | rs1557765 | rs2051772 | 1 | *KCNJ11* |
| 11 | rs163171 | rs151290 | 0.951 | *KCNQ1* |
| 12 | rs1353362 | rs7961581 | 0.973 | *TSPAN8-LGR5* |

**Supplementary Table 2.** **Quantitative association results for the known type 2 diabetes risk allele with birth weight in the European American cohort (n=5,465), sorted by chromosomal location**

NMISS: number of individuals tested; BETA: regression coefficient for the test SNP; SE: standard error of the regression coefficient; R2: r2 value in linear regression; T: test statistic; P: two-sided trend test *P*-value. The direction of effect is shown for the minor allele in each case. *Major allele previously reported to be associated with T2D; ** *P*≤0.002

| CHR | SNP | Minor Allele | MAF | BP | Nearby Gene | NMISS | BETA | SE | R2 | T | P |
| --- | --- | --- | --- | --- | --- | --- | --- | --- | --- | --- | --- |
| 1 | rs2793831 | C | 0.09672 | 120235944 | *NOTCH2* | 5464 | -0.03669 | 0.03247 | 0.0002337 | -1.13 | 0.2585 |
| 2 | rs7578597 | C* | 0.1053 | 43644474 | *THADA* | 5465 | -0.02453 | 0.03119 | 0.0001132 | -0.7865 | 0.4316 |
| 3 | rs17793693 | A* | 0.09634 | 12320971 | *PPARG* | 5465 | 0.04854 | 0.03254 | 0.0004072 | 1.492 | 0.1358 |
| 3 | rs6802898 | T* | 0.1212 | 12366207 | *PPARG* | 5460 | 0.03545 | 0.02948 | 0.0002648 | 1.202 | 0.2293 |
| 3 | rs4411878 | T* | 0.2791 | 64678705 | *ADAMTS9* | 5464 | -0.02584 | 0.02136 | 0.000268 | -1.21 | 0.2263 |
| 3 | rs4402960 | T | 0.3263 | 186994389 | *IGF2BP2* | 5461 | 0.01568 | 0.02017 | 0.0001107 | 0.7774 | 0.4369 |
| 6 | rs4712523 | G | 0.3204 | 20765543 | *CDKAL1* | 5465 | -0.05303 | 0.02068 | 0.001202 | -2.564 | 0.01037 |
| **6** | ****rs7756992** | **G** | **0.2794** | **20787688** | ***CDKAL1*** | **5464** | **-0.08449** | **0.0214** | **0.002846** | **-3.948** | **7.97E-05** |
| 7 | rs1635852 | T* | 0.4941 | 27962651 | *JAZF1* | 5464 | 0.007681 | 0.01921 | 2.93E-05 | 0.3998 | 0.6893 |
| 8 | rs13266634 | T* | 0.2969 | 118253964 | *SLC30A8* | 5460 | 0.01721 | 0.02102 | 0.0001228 | 0.8189 | 0.4129 |
| 9 | rs2383207 | G* | 0.4583 | 22105959 | *CDKN2A/B* | 5465 | 0.003944 | 0.01933 | 7.63E-06 | 0.2041 | 0.8383 |
| 10 | rs11257622 | C | 0.1721 | 12335345 | *CDC123-CAMK1D* | 5456 | -0.01722 | 0.02554 | 8.33E-05 | -0.6741 | 0.5003 |
| 10 | rs1111875 | T* | 0.4027 | 94452862 | *HHEX-IDE* | 5465 | -0.004147 | 0.01949 | 8.29E-06 | -0.2128 | 0.8315 |
| 10 | rs7923837 | A* | 0.3822 | 94471897 | *HHEX-IDE* | 5465 | -0.005545 | 0.01967 | 1.46E-05 | -0.2819 | 0.778 |
| 10 | rs7903146 | T | 0.3057 | 114748339 | *TCF7L2* | 5465 | -0.007205 | 0.02069 | 2.22E-05 | -0.3482 | 0.7277 |
| 11 | rs163171 | T* | 0.23 | 2777641 | *KCNQ1* | 5458 | -0.01573 | 0.02296 | 8.60E-05 | -0.6851 | 0.4933 |
| 11 | rs1557765 | T | 0.3685 | 17360215 | *KCNJ11* | 5457 | 0.002475 | 0.0199 | 2.84E-06 | 0.1244 | 0.901 |
| 11 | rs9300039 | A* | 0.08437 | 41871942 | *Intragenic* | 5458 | 0.0308 | 0.03417 | 0.0001489 | 0.9013 | 0.3674 |
| 11 | rs7480010 | G | 0.3031 | 42203294 | *LOC387761* | 5465 | -0.01876 | 0.02089 | 0.0001475 | -0.8978 | 0.3693 |
| 11 | rs729287 | T* | 0.2498 | 44236666 | *EXT2* | 5464 | 0.01231 | 0.02222 | 5.62E-05 | 0.554 | 0.5796 |
| 11 | rs1387153 | T | 0.2928 | 92313476 | *MTNR1B* | 5465 | 0.05086 | 0.02123 | 0.00105 | 2.396 | 0.01661 |
| 12 | rs1353362 | C | 0.3009 | 69899543 | *TSPAN8-LGR5* | 5451 | 0.0004594 | 0.02079 | 8.96E-08 | 0.02209 | 0.9824 |
| 16 | rs3751812 | T | 0.4025 | 52375961 | *FTO* | 5458 | -0.01666 | 0.01957 | 0.0001328 | -0.8513 | 0.3947 |

**Supplementary Table 3.** **MALES: Quantitative association results for the known type 2 diabetes risk allele with birth weight in the European American cohort (n=2,940), sorted by chromosomal location**

NMISS: number of individuals tested; BETA: regression coefficient for the test SNP; SE: standard error of the regression coefficient; R2: r2 value in linear regression; T: test statistic; P: two-sided trend test *P*-value. The direction of effect is shown for the minor allele in each case. *Major allele previously reported to be associated with T2D

| CHR | SNP | Minor Allele | BP | Nearby Gene | NMISS | BETA | SE | R2 | T | P |
| --- | --- | --- | --- | --- | --- | --- | --- | --- | --- | --- |
| 1 | rs2793831 | C | 120235944 | *NOTCH2* | 2939 | -0.02131 | 0.0438 | 8.06E-05 | -0.4865 | 0.6266 |
| 2 | rs7578597 | C* | 43644474 | *THADA* | 2940 | -0.00469 | 0.04168 | 4.31E-06 | -0.1125 | 0.9104 |
| 3 | rs17793693 | A* | 12320971 | *PPARG* | 2940 | 0.07574 | 0.04376 | 0.001018 | 1.731 | 0.08363 |
| 3 | rs6802898 | T* | 12366207 | *PPARG* | 2938 | 0.007861 | 0.03938 | 1.36E-05 | 0.1996 | 0.8418 |
| 3 | rs4411878 | T* | 64678705 | *ADAMTS9* | 2939 | 0.009029 | 0.02892 | 3.32E-05 | 0.3122 | 0.7549 |
| 3 | rs4402960 | T | 186994389 | *IGF2BP2* | 2939 | -0.01781 | 0.02776 | 0.00014 | -0.6417 | 0.5211 |
| 6 | rs4712523 | G | 20765543 | *CDKAL1* | 2940 | -0.07574 | 0.02763 | 0.00255 | -2.741 | 0.006165 |
| 6 | rs7756992 | G | 20787688 | *CDKAL1* | 2939 | -0.09008 | 0.02872 | 0.003339 | -3.137 | 0.001726 |
| 7 | rs1635852 | T* | 27962651 | *JAZF1* | 2939 | -0.00838 | 0.0261 | 3.51E-05 | -0.3211 | 0.7482 |
| 8 | rs13266634 | T* | 118253964 | *SLC30A8* | 2938 | 0.01811 | 0.02859 | 0.000137 | 0.6337 | 0.5263 |
| 9 | rs2383207 | G* | 22105959 | *CDKN2A/B* | 2940 | 0.01436 | 0.02625 | 0.000102 | 0.5469 | 0.5845 |
| 10 | rs11257622 | C | 12335345 | *CDC123-CAMK1D* | 2934 | -0.03023 | 0.0346 | 0.00026 | -0.8735 | 0.3825 |
| 10 | rs1111875 | T* | 94452862 | *HHEX-IDE* | 2940 | 0.006577 | 0.02625 | 2.14E-05 | 0.2505 | 0.8022 |
| 10 | rs7923837 | A* | 94471897 | *HHEX-IDE* | 2940 | 0.0223 | 0.02645 | 0.000242 | 0.8431 | 0.3993 |
| 10 | rs7903146 | T | 114748339 | *TCF7L2* | 2940 | -0.03476 | 0.02822 | 0.000516 | -1.232 | 0.2182 |
| 11 | rs163171 | T* | 2777641 | *KCNQ1* | 2938 | 0.006558 | 0.03103 | 1.52E-05 | 0.2114 | 0.8326 |
| 11 | rs1557765 | T | 17360215 | *KCNJ11* | 2934 | -0.00883 | 0.02695 | 3.66E-05 | -0.3275 | 0.7433 |
| 11 | rs9300039 | A* | 41871942 | *Intragenic* | 2935 | 0.0435 | 0.04621 | 0.000302 | 0.9413 | 0.3466 |
| 11 | rs7480010 | G | 42203294 | *LOC387761* | 2940 | -0.00889 | 0.02829 | 3.36E-05 | -0.3143 | 0.7533 |
| 11 | rs729287 | T* | 44236666 | *EXT2* | 2939 | -0.03096 | 0.02994 | 0.000364 | -1.034 | 0.3011 |
| 11 | rs1387153 | T | 92313476 | *MTNR1B* | 2940 | 0.05705 | 0.02882 | 0.001332 | 1.979 | 0.04786 |
| 12 | rs1353362 | C | 69899543 | *TSPAN8-LGR5* | 2935 | 0.008965 | 0.02836 | 3.41E-05 | 0.3162 | 0.7519 |
| 16 | rs3751812 | T | 52375961 | *FTO* | 2934 | -0.07035 | 0.0266 | 0.00238 | -2.645 | 0.008215 |

**Supplementary Table 4. FEMALES:** **Quantitative association results for the known type 2 diabetes risk allele with birth weight in the European American cohort (n=2,525), sorted by chromosomal location**

NMISS: number of individuals tested; BETA: regression coefficient for the test SNP; SE: standard error of the regression coefficient; R2: r2 value in linear regression; T: test statistic; P: two-sided trend test *P*-value. The direction of effect is shown for the minor allele in each case. *Major allele previously reported to be associated with T2D

| CHR | SNP | Minor Allele | BP | Nearby Gene | NMISS | BETA | SE | R2 | T | P |
| --- | --- | --- | --- | --- | --- | --- | --- | --- | --- | --- |
| 1 | rs2793831 | C | 120235944 | *NOTCH2* | 2525 | -0.05504 | 0.04837 | 0.000513 | -1.138 | 0.2552 |
| 2 | rs7578597 | C* | 43644474 | *THADA* | 2525 | -0.04909 | 0.04701 | 0.000432 | -1.044 | 0.2965 |
| 3 | rs17793693 | A* | 12320971 | *PPARG* | 2525 | 0.01609 | 0.04865 | 4.33E-05 | 0.3307 | 0.7409 |
| 3 | rs6802898 | T* | 12366207 | *PPARG* | 2522 | 0.06991 | 0.04444 | 0.000981 | 1.573 | 0.1158 |
| 3 | rs4411878 | T* | 64678705 | *ADAMTS9* | 2525 | -0.06663 | 0.03165 | 0.001753 | -2.105 | 0.0354 |
| 3 | rs4402960 | T | 186994389 | *IGF2BP2* | 2522 | 0.05175 | 0.02936 | 0.001232 | 1.763 | 0.07803 |
| 6 | rs4712523 | G | 20765543 | *CDKAL1* | 2525 | -0.02467 | 0.03117 | 0.0002481 | -0.7913 | 0.4289 |
| 6 | rs7756992 | G | 20787688 | *CDKAL1* | 2525 | -0.07729 | 0.0321 | 0.002293 | -2.408 | 0.0161 |
| 7 | rs1635852 | T* | 27962651 | *JAZF1* | 2525 | 0.02613 | 0.02839 | 0.0003355 | 0.9202 | 0.3575 |
| 8 | rs13266634 | T* | 118253964 | *SLC30A8* | 2522 | 0.01632 | 0.03102 | 0.0001098 | 0.5261 | 0.5989 |
| 9 | rs2383207 | G* | 22105959 | *CDKN2A/B* | 2525 | -0.00788 | 0.02856 | 3.02E-05 | -0.2759 | 0.7827 |
| 10 | rs11257622 | C | 12335345 | *CDC123-CAMK1D* | 2522 | -0.002375 | 0.03786 | 1.56E-06 | -0.06273 | 0.95 |
| 10 | rs1111875 | T* | 94452862 | *HHEX-IDE* | 2525 | -0.01666 | 0.02909 | 0.00013 | -0.5727 | 0.5669 |
| 10 | rs7923837 | A* | 94471897 | *HHEX-IDE* | 2525 | -0.03872 | 0.0294 | 0.0006873 | -1.317 | 0.1879 |
| 10 | rs7903146 | T | 114748339 | *TCF7L2* | 2525 | 0.02333 | 0.03045 | 0.0002325 | 0.7659 | 0.4438 |
| 11 | rs163171 | T* | 2777641 | *KCNQ1* | 2520 | -0.04232 | 0.03414 | 0.00061 | -1.24 | 0.2152 |
| 11 | rs1557765 | T | 17360215 | *KCNJ11* | 2523 | 0.01598 | 0.02952 | 0.0001162 | 0.5413 | 0.5883 |
| 11 | rs9300039 | A* | 41871942 | *Intragenic* | 2523 | 0.0159 | 0.05076 | 3.89E-05 | 0.3131 | 0.7542 |
| 11 | rs7480010 | G | 42203294 | *LOC387761* | 2525 | -0.02996 | 0.031 | 0.0003701 | -0.9664 | 0.3339 |
| 11 | rs729287 | T* | 44236666 | *EXT2* | 2525 | 0.06419 | 0.03312 | 0.001487 | 1.938 | 0.05271 |
| 11 | rs1387153 | T | 92313476 | *MTNR1B* | 2525 | 0.04365 | 0.03139 | 0.0007658 | 1.391 | 0.1645 |
| 12 | rs1353362 | C | 69899543 | *TSPAN8-LGR5* | 2516 | -0.009225 | 0.03059 | 3.62E-05 | -0.3016 | 0.763 |
| 16 | rs3751812 | T | 52375961 | *FTO* | 2524 | 0.04513 | 0.02887 | 0.0009676 | 1.563 | 0.1182 |
